# Supplementary material
Source: Springer Nature journal article supplement (https://www.springermedizin.de/resource/supplementary/12936_2014_3326_MOESM14_ESM.pdf/9545666)
Supplement: MOESM14 [file 9545666]

|     |     |     |      |      |     |     |     |     |
|-----|-----|-----|------|------|-----|-----|-----|-----|
| 3.8 | 3.1 | 5.8 | 16.4 | 60.4 | 8.2 | 9.2 | 3.8 | 5.5 |
|-----|-----|-----|------|------|-----|-----|-----|-----|

163.3

|     |     |     |
|-----|-----|-----|
| 8.2 | 3.4 | 9.9 |
| 4.1 | 1.7 | 5.1 |
| 4.7 | 3.8 | 6.4 |
